# Supplementary material for: MiR-384 inhibits human colorectal cancer metastasis by targeting KRAS and CDC42
Source: PubMed Central journal article supplement (PMC5356701; doi:10.18632/oncotarget.12704), 2016-10-17
Supplement: oncotarget-07-84826-s001.pdf [file oncotarget-07-84826-s001.pdf]

## MiR-384 inhibits human colorectal cancer metastasis by targeting KRAS and CDC42

### SUPPLEMENTARY FIGURES AND TABLES

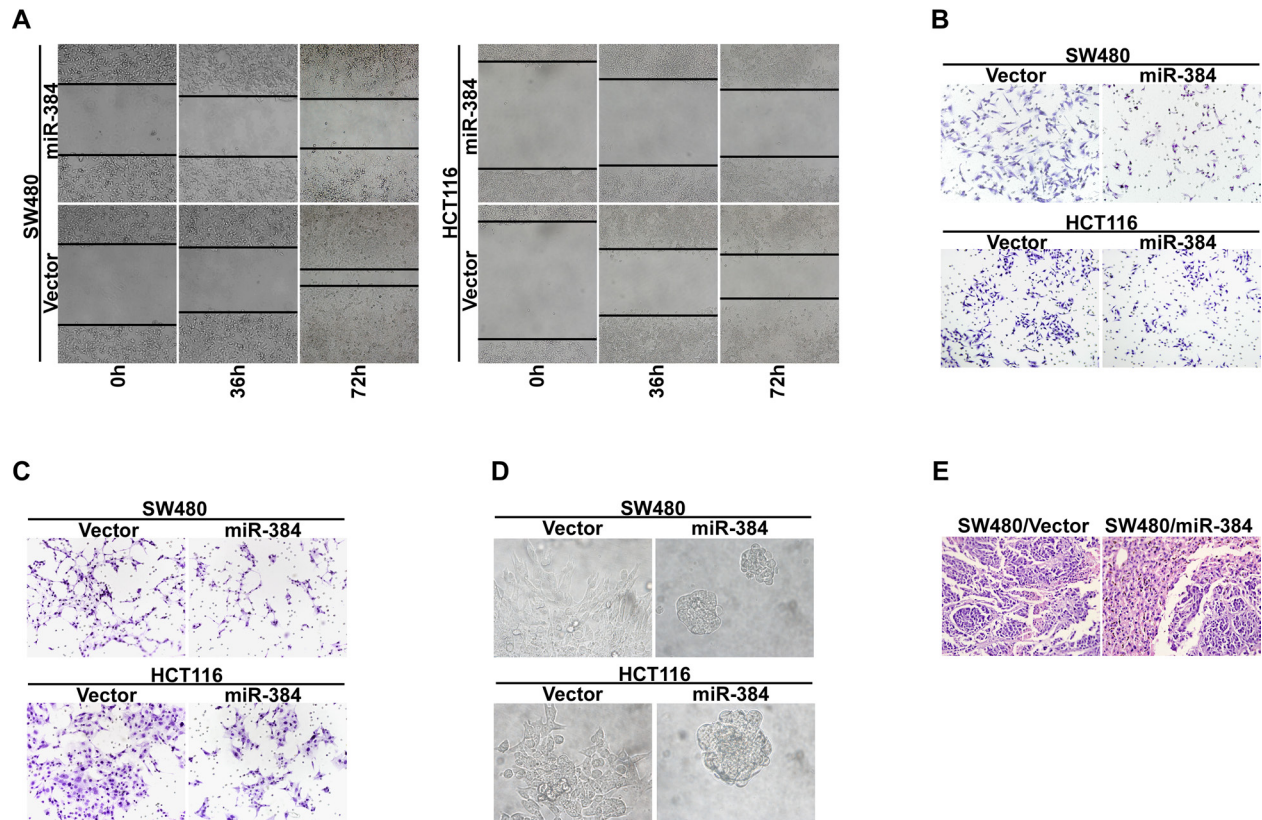

**Supplementary Figure S1:** **A.** Representative images of wound-healing assay. Original magnification,  $\times 100$ . **B-C.** The migratory and invasive properties of SW480/Vector, SW480/miR-384 and HCT116/Vector, HCT116/miR-384 cells were analyzed using Boyden chambers or Matrigel-coated Boyden chambers. Original magnification,  $\times 200$ . **D.** Representative images of three-dimensional morphologies assay. Original magnification,  $\times 400$ . **E.** Representative images of HE staining of liver metastatic lesions formed in mice injected intrasplenically with SW480/Vector and SW480/miR-384. Original magnification,  $\times 400$ .

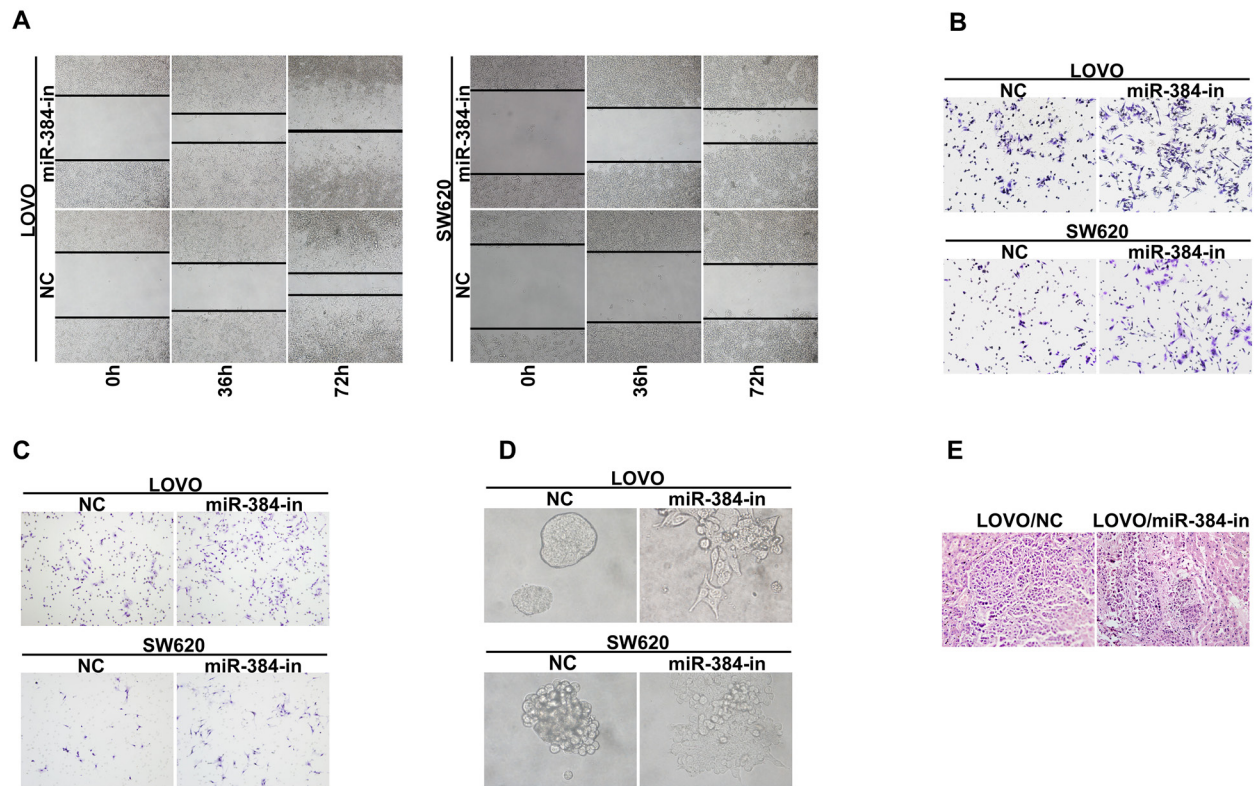

**Supplementary Figure S2:** **A.** Representative images of wound-healing assay. Original magnification,  $\times 100$ . **B-C.** The migratory and invasive properties of LOVO/NC, LOVO/miR-384-in and SW620/NC, SW620/miR-384-in cells were analyzed using Boyden chambers or Matrigel-coated Boyden chambers. Original magnification,  $\times 200$ . **D.** Representative images of three-dimensional morphologies assay. Original magnification,  $\times 400$ . **E.** Representative images of HE staining of liver metastatic lesions formed in mice injected intrasplenically with LOVO/NC and LOVO/miR-384-in. Original magnification,  $\times 400$ .

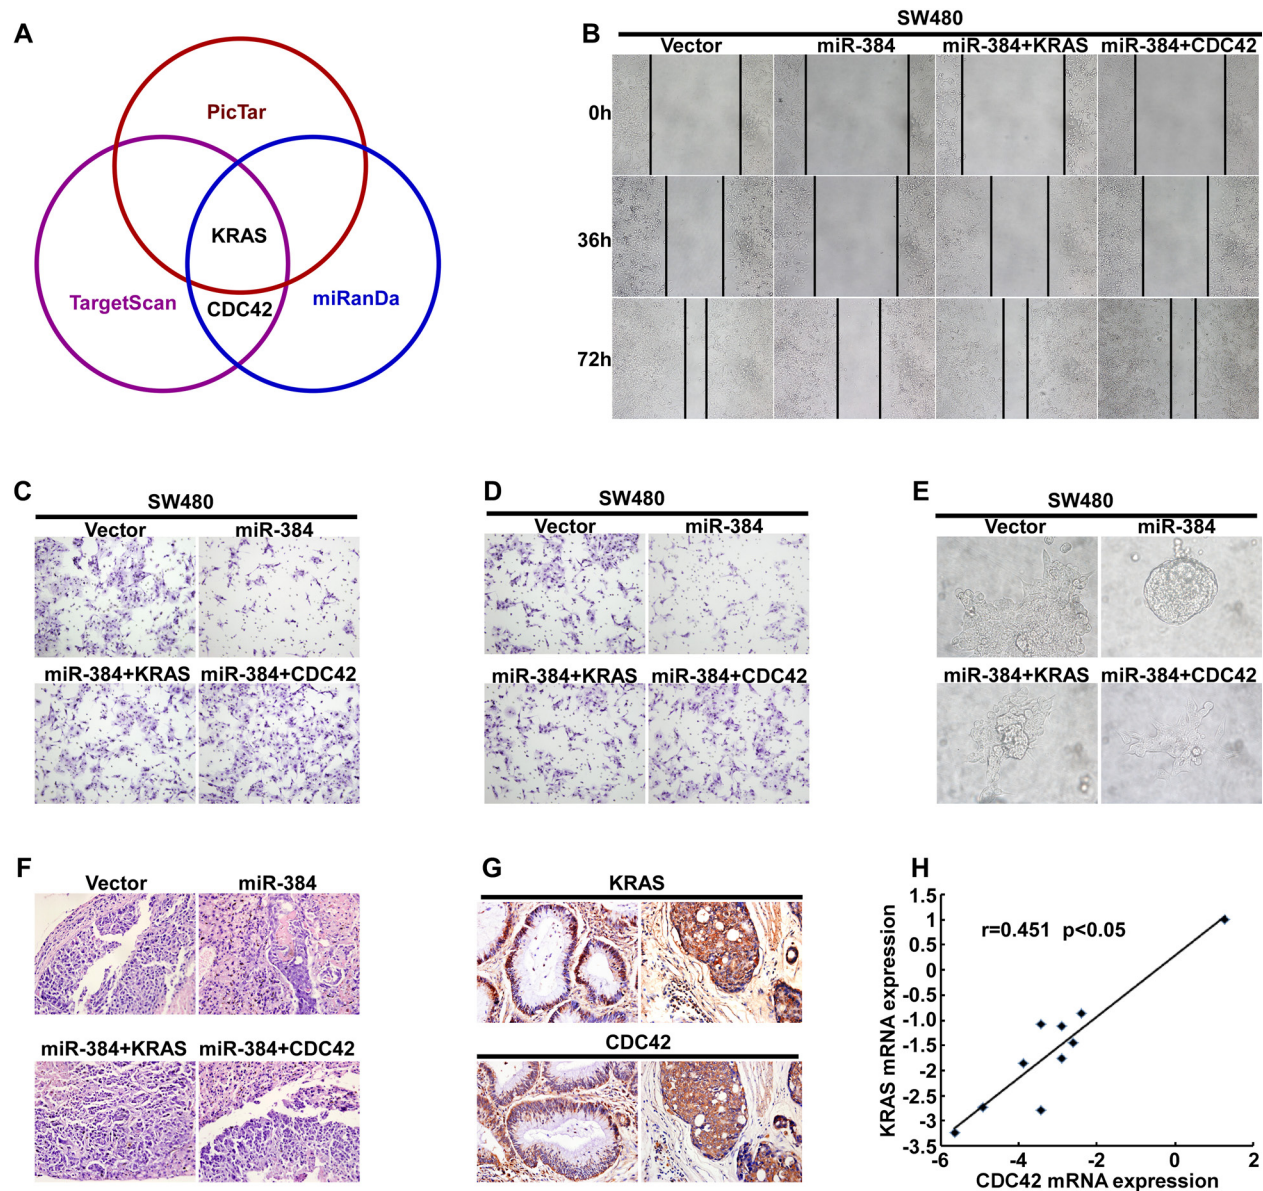

**Supplementary Figure S3: KRAS and CDC42 are targets of miR-384 and repression of KRAS and CDC42 plays an important role in miR-384-inhibited invasion and metastasis of CRC cells.** **A.** KRAS and CDC42 are targets of miR-384 according to the publicly available bioinformatic algorithms. **B.** Representative images of wound-healing assay. Original magnification,  $\times 100$ . **C-D.** The migratory and invasive properties of SW480/Vector, SW480/miR-384, SW480/miR-384+KRAS and SW480/miR-384+CDC42 cells were analyzed using Boyden chambers or Matrigel-coated Boyden chambers. Original magnification,  $\times 200$ . **E.** Representative images of three-dimensional morphologies assay. Original magnification,  $\times 400$ . **F.** Representative images of HE staining of liver metastatic lesions formed in mice injected intrasplenically with SW480/Vector, SW480/miR-384, SW480/miR-384+KRAS and SW480/miR-384+CDC42. Original magnification,  $\times 400$ . **G.** The protein expression of KRAS and CDC42 by IHC in CRC tissues (Left, high miR-384 expression; Right, low miR-384 expression). Original magnification,  $\times 400$ . **H.** Spearman correlation analyses of KRAS expression and CDC42 mRNA expression.

**Supplementary Table S1: Spearman correlation between miR-384 expression and Clinicopathologic Characteristics of CRC**

| Clinicopathological Variables | miR-384 Expression               |         |
|-------------------------------|----------------------------------|---------|
|                               | Spearman correlation coefficient | P value |
| Age                           | 0.088                            | 0.382   |
| Gender                        | 0.084                            | 0.404   |
| Differentiation               | 0.801                            | 0.000   |
| T classification              | 1.000                            | 0.000   |
| N classification              | 0.391                            | 0.000   |
| M classification              | 0.444                            | 0.000   |



**Supplementary Table S2: Primer sequences used for target gene real-time PCR**

| <b>Gene</b>  | <b>Forward primer</b>  | <b>Reverse primer</b>  |
|--------------|------------------------|------------------------|
| <b>KRAS</b>  | GAGTACAGTGCAATGAGGGAC  | CCTGAGCCTGTTTTGTGTCTAC |
| <b>CDC42</b> | GAAGGCTGTCAAGTATGTGG   | CTCTTCTTCGGTTCTGGAGG   |
| <b>GAPDH</b> | GACTCATGACCACAGTCCATGC | AGAGGCAGGGATGATGTTCTG  |

**Supplementary Table S3: Primer sequences used for amplification and plasmid construction**

| <b>Gene</b>           | <b>Forward primer</b>               | <b>Reverse primer</b>                  |
|-----------------------|-------------------------------------|----------------------------------------|
| <b>KRAS-3'UTR-WT</b>  | <b>CCGCTCGAG AGGCAGACCCAGTATGAA</b> | <b>GGGGCGGCCGCGACCACCACAGAGTGAGATT</b> |
| <b>CDC42-3'UTR-WT</b> | <b>CCGCTCGAGTCCCTGGTTCCACTCT</b>    | <b>AAATATGCGGCCGCATCAGCAAATGGCAA</b>   |

**Supplementary Table S4: Sequences of miR-384 mimic and inhibitor**

| <b>Geneb</b>                | <b>Sequence</b>                           |
|-----------------------------|-------------------------------------------|
| <b>miR-384 mimic</b>        | AUUCCUAGAAAUUGUUCAUA UGAACAAUUUCUAGGAAUUU |
| <b>miR-384 inhibitor</b>    | UAUGAACAAUUUCUAGGAAU                      |
| <b>miR-384 mimic NC</b>     | UUCUCCGAACGUGUCACGU                       |
| <b>miR-384 inhibitor NC</b> | CAGUACUUUUGUGUAGUACAA                     |
